# Supplementary material for: Sirt5 Deacylation Activities Show Differential Sensitivities to Nicotinamide Inhibition
Source: PubMed Central journal article supplement (PMC3446968; doi:10.1371/journal.pone.0045098), 2012-09-19

**Suppl. Fig. S2: Microscale thermophoresis experiments for determination of dissociation constants for NAD<sup>+</sup> binding to human Sirt3 and Sirt5 (A) in absence or presence of nicotinamide (NAM) or (B) in absence or presence of 25  $\mu$ M substrate peptide**

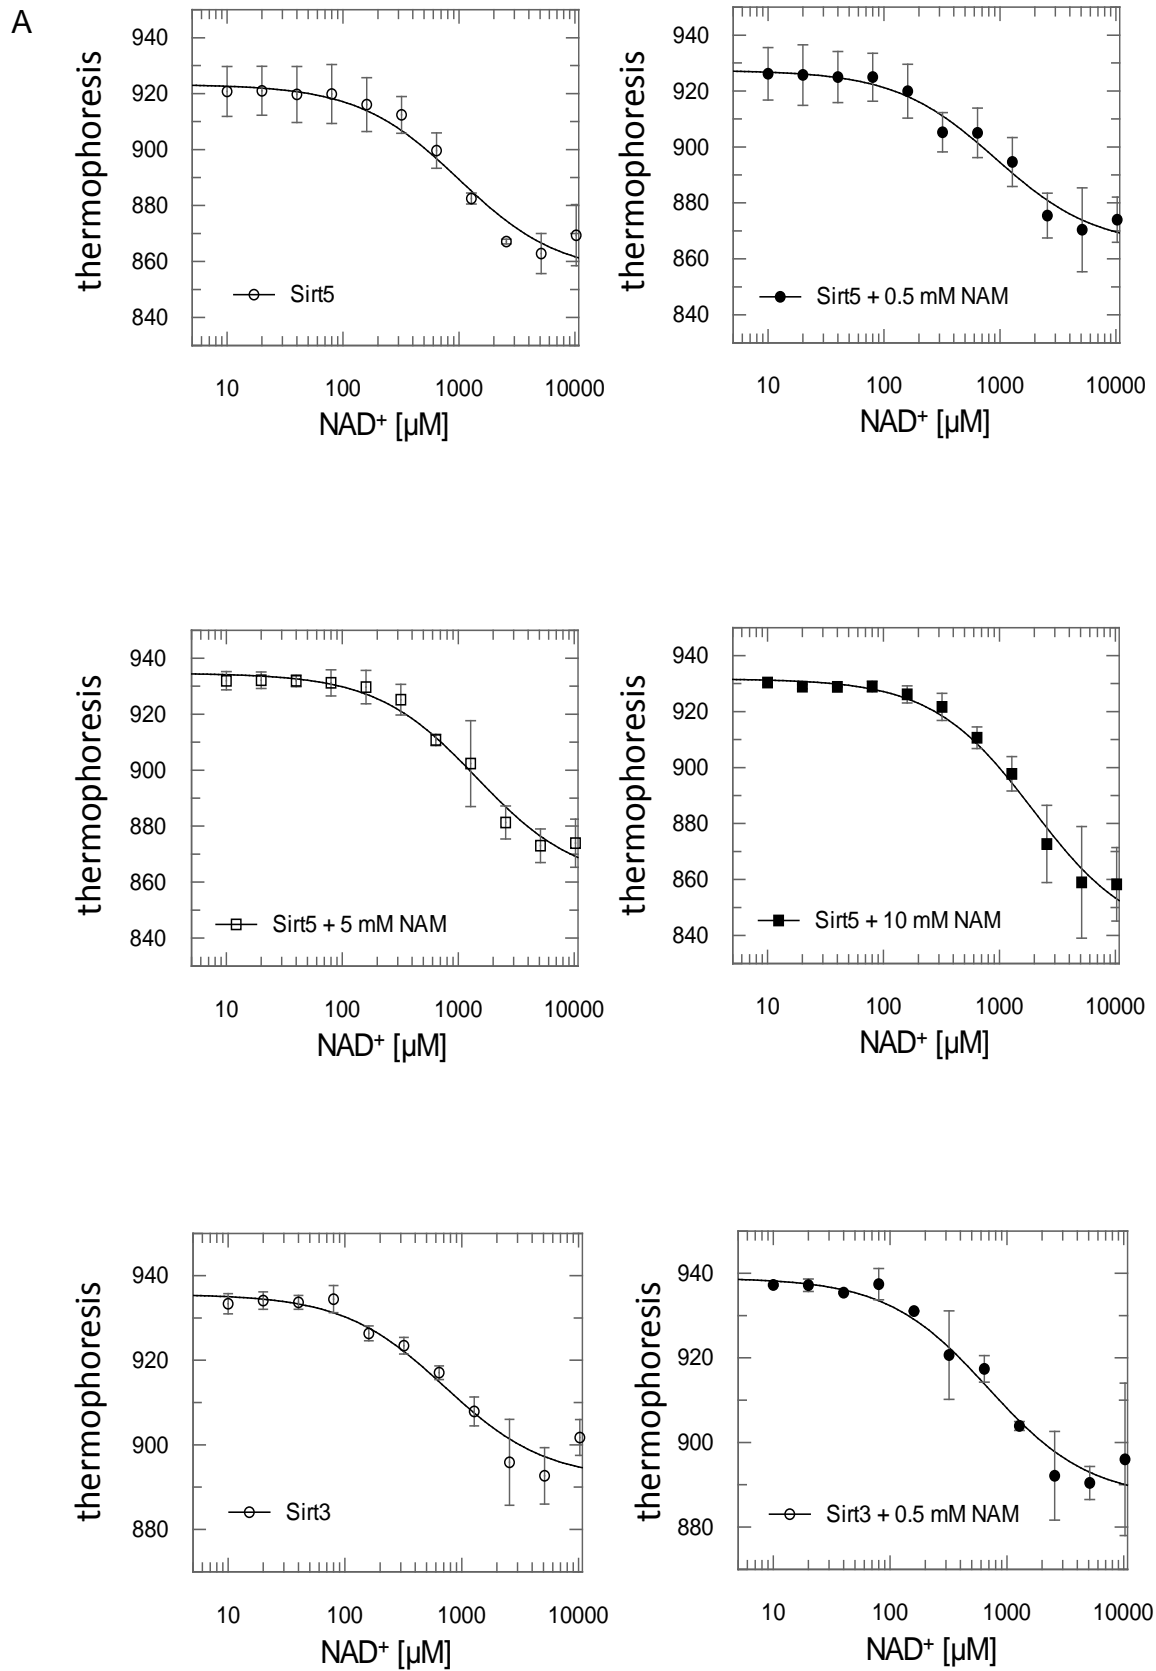

B

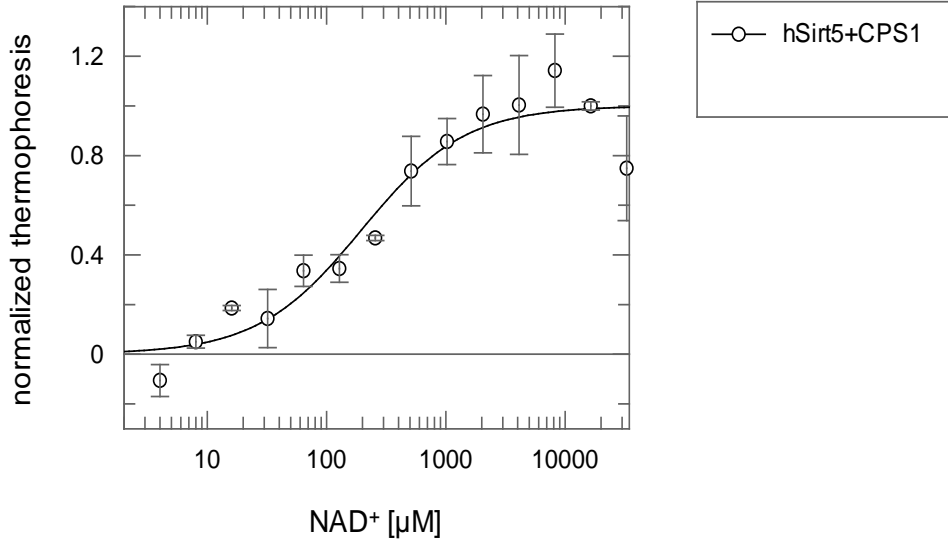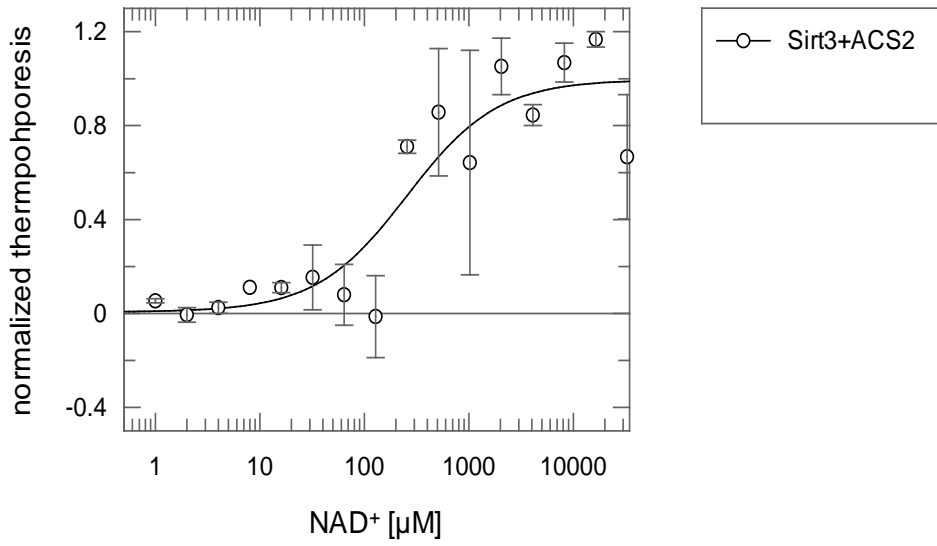

Supplement: pone.0045098.s002.pdf [file pone.0045098.s002.pdf]
