# Supplementary material for: Sirt5 Deacylation Activities Show Differential Sensitivities to Nicotinamide Inhibition
Source: PubMed Central journal article supplement (PMC3446968; doi:10.1371/journal.pone.0045098), 2012-09-19

**Suppl. Fig. S3: Nicotinamide (NAM) dose response curves for various Sirtuins. The same set of data for human Sirt3 and Sirt5 from Fig. 2A is included in all graphs for comparison.**

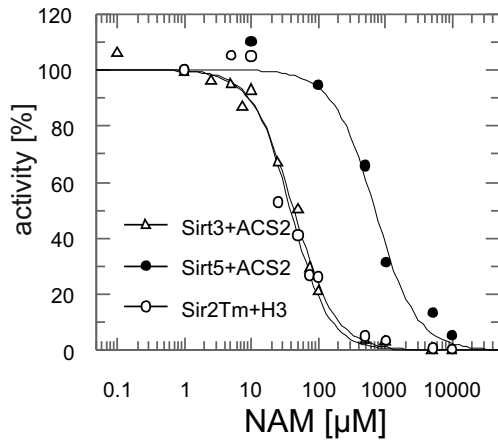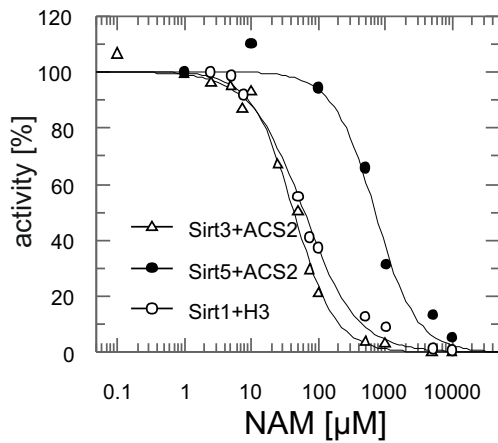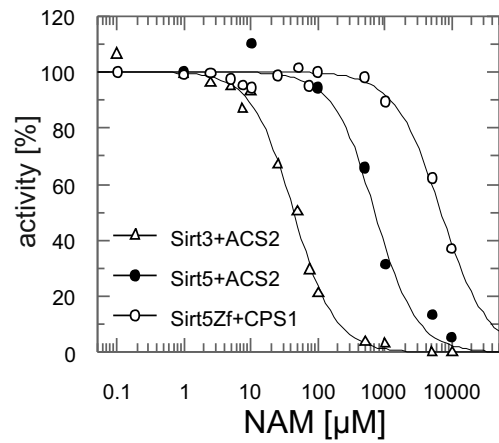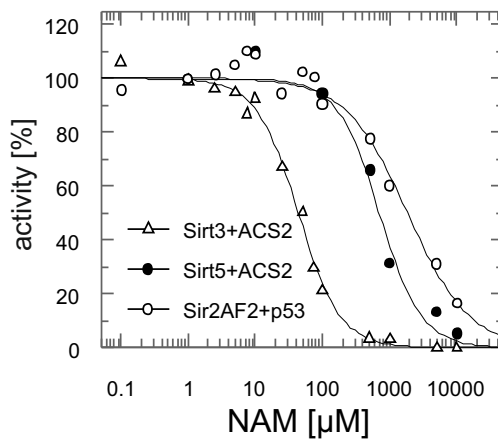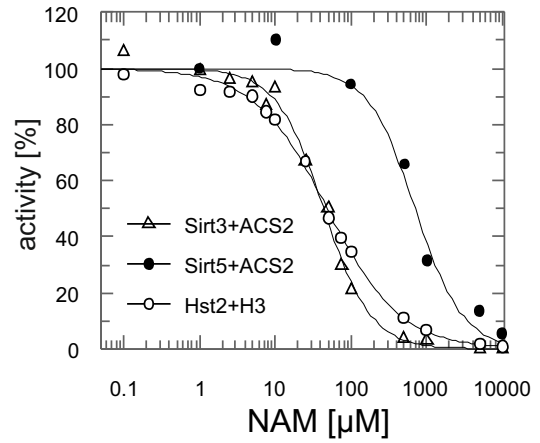

Supplement: pone.0045098.s003.pdf [file pone.0045098.s003.pdf]
